# Supplementary material for: Professional Advocacy in Focus: A Qualitative Descriptive Study of Nurses and Midwives Perceptions in one UK NHS Trust
Source: Research Square preprint supplement (doi:10.21203/rs.3.rs-7374915/v1), 2025-08-20
Supplement: Supplementary file 1 [file 81ac250bdb25ff901791070b.xlsx]

## Sheet: Sheet1
Culture shift	Example
Normalising wellbeing discussions	· Regular informal peer-to-peer check-ins
	· Structured PA activities such as RCS,
	· PA related workshops, and training sessions that focus on mental health awareness and context informed coping strategies.
Promoting inclusivity and diversity	· Encouragement of diversity within the PA provision
	· Provision of peer-peer support to enhance cultural competence
Encouraging feedback and continuous Improvement	· Reinforcement of a PA culture where feedback is actively sought and valued
	· Delivery of feedback mechanisms such as surveys, suggestion boxes, and PA facilitated forums
Recognising and rewarding contributions	· Continuing the formal recognition of PA registration
	· Extend PA awards (both for the PA and those who engagement with PA)
	· Recognition of PA work in Trust newsletters and communications
Fostering collaboration and teamwork	· PA teamworking as routine to create a cohesive PA service
	· Involvement in cross-departmental working
	· Inclusion in inter-disciplinary PA activities
	· Continued development of an online PA presence where staff can collaborate and share ideas.
Providing professional development opportunities	· Investment in PA development (both formally and informally),
	· Support for formal and informal peer-to-peer PA training, mentorship opportunities, and buddying
Fully integrating PA services	· Improved connection with organisational structures
	· As routine, promote the availability of informal and formal PA
	· Ensure that PAs have the resources and managerial backing to provide meaningful support.
